# Supplementary material for: Validity of a Four-Item Household Water Insecurity Experiences Scale for Assessing Water Issues Related to Health and Well-Being
Source: PubMed Central journal article supplement (PMC7790094; doi:10.4269/ajtmh.20-0417), 2020-10-26
Supplement: tpmd200417.SD1.pdf [file tpmd200417.SD1.pdf]

**Supplemental Table S1.** Characteristics of the sites included in HWISE short form analyses, by data source.

| Data source                           | Site                                          | Season of data collection    | Proportion of female respondents | HWISE Scale score <sup>†</sup> , mean(sd) | Data available for short form analyses <sup>†</sup> |          |                         |
|---------------------------------------|-----------------------------------------------|------------------------------|----------------------------------|-------------------------------------------|-----------------------------------------------------|----------|-------------------------|
|                                       |                                               |                              |                                  |                                           | Accuracy                                            | Validity | Sensitivity-specificity |
| HWISE scale development study, wave 1 | Mérida, Mexico (n=247)                        | Dry season                   | 62.8                             | –                                         |                                                     | X        |                         |
|                                       | Acatenango, Guatemala (n=95)                  | Dry season                   | 92.5                             | –                                         |                                                     | X        |                         |
|                                       | Honda, Colombia (n=170)                       | Rainy season                 | 64.7                             | –                                         |                                                     | X        |                         |
|                                       | Ceará, Brazil (n=201)                         | Neither rainy nor dry season | 71.6                             | –                                         |                                                     | X        |                         |
|                                       | Accra, Ghana (n=227)                          | Rainy season                 | 78.4                             | –                                         |                                                     | X        |                         |
|                                       | Lagos, Nigeria (n=235)                        | Rainy season                 | 73.0                             | –                                         |                                                     | X        |                         |
|                                       | Kahemba, Democratic Republic of Congo (n=390) | Dry season                   | 65.9                             | –                                         |                                                     | X        |                         |
|                                       | Bahir Dar, Ethiopia (n=253)                   | Rainy season                 | 100                              | –                                         |                                                     | X        |                         |
|                                       | Kampala, Uganda (n=236)                       | Dry season                   | 68.6                             | –                                         |                                                     | X        |                         |
|                                       | Arua, Uganda (n=242)                          | Rainy season                 | 85.1                             | –                                         |                                                     | X        |                         |
|                                       | Kisumu, Kenya (n=247)                         | Neither rainy nor dry season | 81.3                             | –                                         |                                                     | X        |                         |
|                                       | Singida, Tanzania (n=563)                     | Dry season                   | 56.7                             | –                                         |                                                     | X        |                         |
|                                       | Lilongwe, Malawi (n=297)                      | Neither rainy nor dry season | 86.9                             | –                                         |                                                     | X        |                         |
|                                       | Dushanbe, Tajikistan (n=222)                  | Dry season                   | 73.4                             | –                                         |                                                     | X        |                         |
|                                       | Kathmandu, Nepal (n=259)                      | Rainy season                 | 71.8                             | –                                         |                                                     | X        |                         |
| Upolu, Samoa (n=174)                  | Across multiple seasons                       | 57.0                         | –                                |                                           | X                                                   |          |                         |
| HWISE scale development study, wave 2 | Torreón, Mexico (n=239)                       | Dry season                   | 72.8                             | 8.6 (8.4)                                 | X                                                   | X        | X                       |
|                                       | Gressier, Haiti (n=280)                       | Dry season                   | 98.6                             | 9.8 (9.1)                                 | X                                                   | X        | X                       |
|                                       | San Borja, Bolivia (n=171)                    | Dry season                   | 62.8                             | 17.5 (7.9)                                | X                                                   | X        | X                       |
|                                       | Chiquimula, Guatemala (n=286)                 | Dry season                   | 85.7                             | 5.2 (5.3)                                 | X                                                   | X        | X                       |
|                                       | Cartagena, Colombia (n=218)                   | Dry season                   | 70.6                             | 20.9 (7.5)                                | X                                                   | X        | X                       |
|                                       | Morogoro, Tanzania (n=256)                    | Rainy season                 | 78.1                             | 4.2 (4.8)                                 | X                                                   | X        | X                       |
|                                       | Sistan & Balochistan, Iran (n=132)            | Rainy season                 | 99.2                             | 6.0 (6.5)                                 | X                                                   | X        | X                       |

|                                           |                                                   |                         |      |            |   |   |   |
|-------------------------------------------|---------------------------------------------------|-------------------------|------|------------|---|---|---|
|                                           | Beirut, Lebanon (n=544)                           | Rainy season            | 64.2 | 7.1 (7.0)  | X | X | X |
|                                           | Punjab, Pakistan (n=47)                           | Dry season              | 76.6 | 20.4 (5.9) | X | X | X |
|                                           | Pune, India (n=171)                               | Across multiple seasons | 100  | 1.6 (4.2)  | X | X | X |
|                                           | Rajasthan, India (n=208)                          | Dry season              | 27.4 | 13.9 (7.4) | X | X | X |
|                                           | Dhaka & Chakaria, Bangladesh (n=473) <sup>‡</sup> | Rainy season            | 97.0 | 6.9 (8.0)  | X | X | X |
|                                           | Labuan Bajo, Indonesia (n=268)                    | Dry season              | 44.4 | 13.8 (7.7) | X | X | X |
| Oxfam Great Britain Effectiveness Reviews | North Kivu, Democratic Republic of Congo (n=988)  | Dry season              | 48.6 | 10.7 (9.9) | X |   | X |
|                                           | Lusaka, Zambia (n=922)                            | Dry season              | 52.9 | 9.9 (10.8) | X |   | X |

<sup>‡</sup>HWISE Scale score range: 0-36

<sup>†</sup>*Accuracy*: data needed to compare subset score to full HWISE Scale scores; *validity*: data needed to assess relationships between subset scores and food insecurity, perceived stress, satisfaction with water situation, perceived water standing in the community, time to water source, and injury while fetching water; *sensitivity-specificity*: data needed to compare the proportion of correctly specified households, as determined using full HWISE Scale scores, for each cut-point in the candidate subset

<sup>‡</sup>Data collected following HWISE study protocol but not published in validation manuscript

**Supplemental Table S2.** Characteristics of candidate items for the HWISE short form, ordered by Rasch severity scores for HWISE wave 2 study sites.

| HWISE Scale items                                       | Issues noted by implementers                                                                                     | Mean severity score across sites <sup>†</sup> | Correlation coefficient <sup>‡</sup> | Water insecurity constructs |               |             |     |
|---------------------------------------------------------|------------------------------------------------------------------------------------------------------------------|-----------------------------------------------|--------------------------------------|-----------------------------|---------------|-------------|-----|
|                                                         |                                                                                                                  |                                               |                                      | Availability                | Accessibility | Reliability | Use |
| <b>Worry about enough water for all household needs</b> |                                                                                                                  | 1.82                                          | 0.730                                | X                           | X             | X           | X   |
| Water supply interrupted                                |                                                                                                                  | 2.18                                          | 0.697                                |                             | X             | X           |     |
| Unable to wash clothes                                  | Some respondents washed their clothes off premises and required additional guidance to answer                    | 3.00                                          | 0.825                                |                             |               |             | X   |
| Upset or angry about water situation                    | This was considered a politically sensitive question in some settings and required additional prompting          | 4.27                                          | 0.705                                | X                           | X             | X           | X   |
| <b>Changed plans due to water situation</b>             |                                                                                                                  | 5.27                                          | 0.778                                |                             | X             | X           |     |
| <b>Not as much water to drink as liked</b>              |                                                                                                                  | 6.45                                          | 0.758                                |                             |               |             | X   |
| Unable to wash body                                     |                                                                                                                  | 7.45                                          | 0.774                                |                             |               |             | X   |
| Changed what foods were prepared                        | Male respondents may underreport this if a female household member primarily determines which foods are prepared | 7.55                                          | 0.757                                |                             |               |             | X   |
| <b>No water in the household whatsoever</b>             |                                                                                                                  | 8.73                                          | 0.691                                |                             |               |             | X   |
| Felt ashamed about water situation                      | This was considered a sensitive question in some settings and required additional prompting                      | 9.73                                          | 0.577                                |                             | X             | X           | X   |
| <b>Unable to wash hands</b>                             |                                                                                                                  | 10.36                                         | 0.727                                |                             |               |             | X   |
| Went to sleep thirsty                                   |                                                                                                                  | 11.18                                         | 0.538                                |                             |               |             | X   |

<sup>†</sup>Rasch severity scores only available for the 12 wave 2 sites included in the original HWISE Scale validation study

<sup>‡</sup>Calculated using data from all 13 HWISE wave 2 study sites

Bolded items are those included in the candidate 4- and 5-item subsets.

**Supplemental Table S3.** Linear regressions of full HWISE Scale scores on two candidate subsets of items and their internal consistency, by study population and controlling for site.

|                                             | Subset of four items <sup>†</sup> (range: 0-12) |         |      |                         |                  | Subset of five items <sup>‡</sup> (range: 0-15) |         |      |                         |                  |
|---------------------------------------------|-------------------------------------------------|---------|------|-------------------------|------------------|-------------------------------------------------|---------|------|-------------------------|------------------|
|                                             | $\beta$                                         | p-value | RMSE | Correlation coefficient | Cronbach's alpha | $\beta$                                         | p-value | RMSE | Correlation coefficient | Cronbach's alpha |
| <b>HWISE wave 1 study sites</b><br>(n=4058) | –                                               | –       | –    | –                       | 0.713            | –                                               | –       | –    | –                       | 0.762            |
| <b>HWISE wave 2 study sites</b><br>(n=3293) | 2.45                                            | <0.001  | 2.68 | 0.949                   | 0.789            | 2.08                                            | <0.001  | 2.42 | 0.959                   | 0.822            |
| <b>North Kivu, DRC</b> (n=988)              | 2.91                                            | <0.001  | 2.13 | 0.980                   | 0.925            | 2.36                                            | <0.001  | 1.56 | 0.990                   | 0.938            |
| <b>Lusaka, Zambia</b> (n=922)               | 2.88                                            | <0.001  | 2.48 | 0.968                   | 0.851            | 2.34                                            | <0.001  | 1.84 | 0.983                   | 0.885            |

<sup>†</sup>Subset of four items: worry, change plans, not as much to drink as liked, and unable to wash hands

<sup>‡</sup>Subset of five items: worry, change plans, not as much to drink as liked, unable to wash hands, and no water whatsoever  
 RMSE: root mean square error, i.e., standard deviation of residuals

**Supplemental Table S4.** Tests of the criterion validity of the four-item HWISE subset in (A) 16 HWISE wave 1 study sites in 14 low- and middle-income countries and (B) 13 HWISE wave 2 study sites in 12 low- and middle-income countries, using random coefficient regression models controlling for site.

**(A)**

|                                                                                                                                                                                                                                                                | <b>Coefficient (95% CI)</b> | <b>RMSE</b> | <b>ICC</b> |
|----------------------------------------------------------------------------------------------------------------------------------------------------------------------------------------------------------------------------------------------------------------|-----------------------------|-------------|------------|
| <b>Predictive validity</b>                                                                                                                                                                                                                                     |                             |             |            |
| 4-item Perceived Stress Scale score (0-16)<br>(n=3824)                                                                                                                                                                                                         | 0.25 (0.17, 0.33)***        | 2.56        | 0.19       |
| Household Food Insecurity Access score (0-27)<br>(n=3759)                                                                                                                                                                                                      | 0.96 (0.78, 1.13)***        | 4.52        | 0.27       |
| <b>Convergent validity</b>                                                                                                                                                                                                                                     |                             |             |            |
| Time (minutes) to water source (n=3719)                                                                                                                                                                                                                        | 0.02 (0.02, 0.03)***        | 1.96        | 0.28       |
| <b>Discriminant validity</b>                                                                                                                                                                                                                                   |                             |             |            |
| If injured while fetching water (n=2505)                                                                                                                                                                                                                       | 1.41 (0.93, 1.88)***        | 1.88        | 0.38       |
| * $p < 0.05$ ; ** $p < 0.01$ ; *** $p < 0.0001$<br><sup>†</sup> Four items: worry, change plans, not as much to drink as liked, and unable to wash hands<br>RMSE: root mean square error, i.e., standard deviation of residuals<br>ICC: intraclass correlation |                             |             |            |

**(B)**

|                                                                                                                                                                                                                                                                | <b>Coefficient (95% CI)</b> | <b>RMSE</b> | <b>ICC</b> |
|----------------------------------------------------------------------------------------------------------------------------------------------------------------------------------------------------------------------------------------------------------------|-----------------------------|-------------|------------|
| <b>Predictive validity</b>                                                                                                                                                                                                                                     |                             |             |            |
| Satisfaction with water situation (n=3291)                                                                                                                                                                                                                     | -0.17 (-0.20, -0.15)***     | 1.12        | 0.26       |
| Perceived water standing in community (n=3208)                                                                                                                                                                                                                 | 0.36 (0.26, 0.45)***        | 2.33        | 0.12       |
| 4-item Perceived Stress Scale score (0-16)<br>(n=3227)                                                                                                                                                                                                         | 0.12 (0.04, 0.20)**         | 2.41        | 0.13       |
| Household Food Insecurity Access score (0-27)<br>(n=3142)                                                                                                                                                                                                      | 0.80 (0.55, 1.07)***        | 5.57        | 0.27       |
| <b>Convergent validity</b>                                                                                                                                                                                                                                     |                             |             |            |
| Time (minutes) to water source (n=2959)                                                                                                                                                                                                                        | 0.02 (0.01, 0.03)***        | 2.63        | 0.38       |
| <b>Discriminant validity</b>                                                                                                                                                                                                                                   |                             |             |            |
| If injured while fetching water (n=2696)                                                                                                                                                                                                                       | 1.50 (0.64, 2.37)**         | 2.73        | 0.38       |
| * $p < 0.05$ ; ** $p < 0.01$ ; *** $p < 0.0001$<br><sup>†</sup> Four items: worry, change plans, not as much to drink as liked, and unable to wash hands<br>RMSE: root mean square error, i.e., standard deviation of residuals<br>ICC: intraclass correlation |                             |             |            |

**Supplemental Table S5.** Proportion of households correctly classified as being water secure or insecure on the basis of the cut-point of  $\geq 12$  in the full HWISE scale (range: 0-36), by selected cut-points for the four-item HWISE subset (range: 0-12).

|                                          | $\geq 3$ | $\geq 4$ | $\geq 5$ |
|------------------------------------------|----------|----------|----------|
| <b>HWISE wave 2 study sites</b> (n=3293) | 82.75    | 91.28    | 92.35    |
| <b>North Kivu, DRC</b> (n=988)           | 91.80    | 93.42    | 88.06    |
| <b>Lusaka, Zambia</b> (n=922)            | 84.71    | 91.65    | 89.59    |
